# Supplementary material for: Passive Deicing CFRP Surfaces Enabled by Super-Hydrophobic Multi-Scale Micro-Nano Structures Fabricated via Femtosecond Laser Direct Writing
Source: Nanomaterials (Basel). 2022 Aug 13;12(16):2782. doi: 10.3390/nano12162782 (PMC9412491; doi:10.3390/nano12162782)
Supplement: Supplementary file 1 [file nanomaterials-12-02782-s001.zip › nanomaterials-1818318-supplementary.pdf]

# Passive Deicing CFRP Surfaces Enabled by Super-Hydrophobic Multi-Scale Micro-Nano Structures Fabricated via Femtosecond Laser Direct Writing

Zihan Zhang <sup>1,†</sup>, Jiakang Zhou <sup>1,†</sup>, Yuqi Ren <sup>1</sup>, Weihai Li <sup>1</sup>, Sheng Li <sup>1</sup>, Nian Yao Chai <sup>1,2</sup>, Zhongle Zeng <sup>1</sup>, Xiangyu Chen <sup>1</sup>, Yunfan Yue <sup>1</sup>, Ling Zhou <sup>3,\*</sup>, Yi-Bing Cheng <sup>1,2</sup>, Shuxin Li <sup>1,2</sup> and Xuewen Wang <sup>1,2,\*</sup>

<sup>1</sup> State Key Laboratory of Advanced Technology for Materials Synthesis and Processing, International School of Materials Science and Engineering, Wuhan University of Technology, Wuhan 430070, China

<sup>2</sup> Foshan Xianhu Laboratory of the Advanced Energy Science and Technology Guangdong Laboratory, Foshan 528216, China

<sup>3</sup> Hubei Key Laboratory of Theory and Application of Advanced Materials Mechanics, School of Science, Wuhan University of Technology, Wuhan 430070, China

\* Correspondence: zling1980@whut.edu.cn (L.Z.); xwwang@whut.edu.cn (X.W.)

† These authors contributed equally to this work.

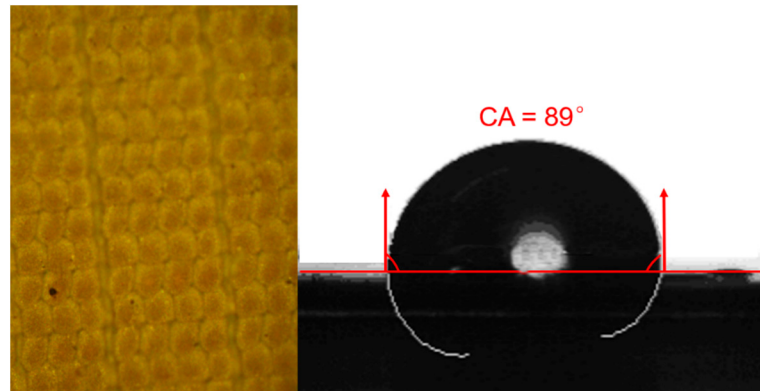

**Figure S1.** Damaged structure (point array with 50  $\mu\text{m}$  spacing) and its static contact angle.

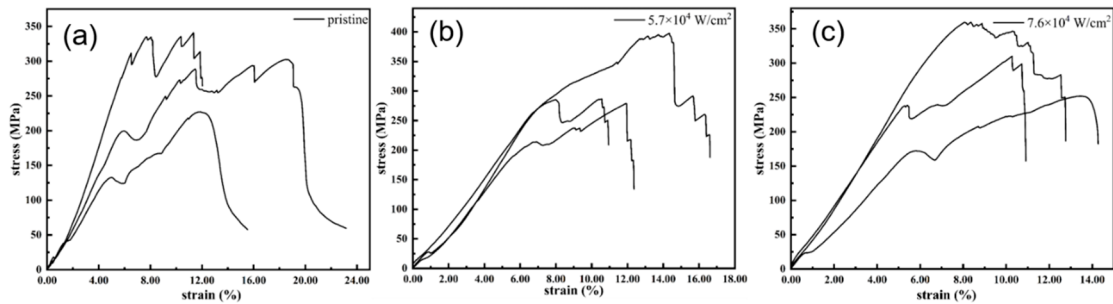

**Figure S2.** stress-strain curves of (a) the pristine, 80  $\mu\text{m}$  grid processed by (b)  $5.7 \times 10^4 \text{ W/cm}^2$  and (c)  $7.6 \times 10^4 \text{ W/cm}^2$ .

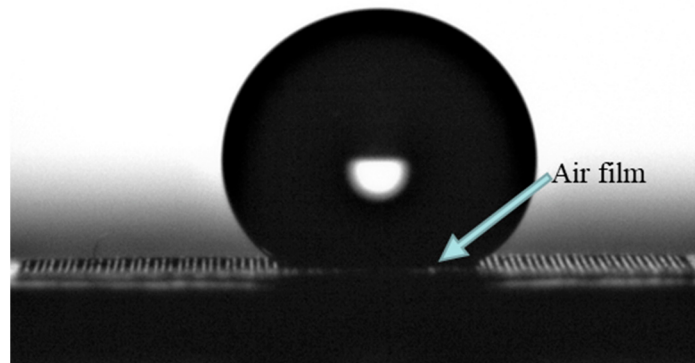

**Figure S3.** The suspected air film in the contact angle image.

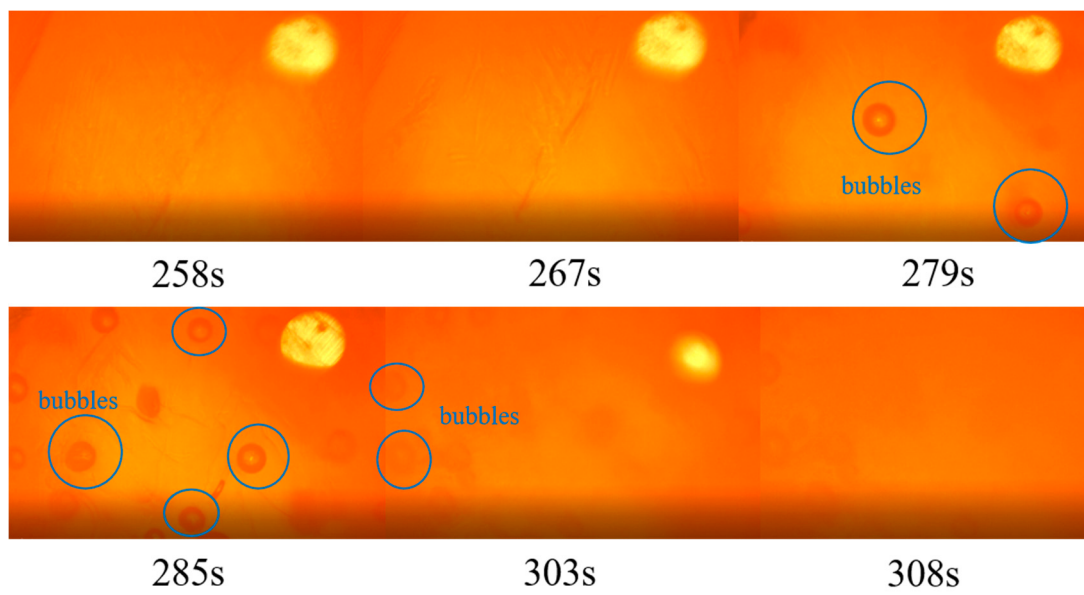

**Figure S4.** CCD camera records of the freezing process (from 258s to 308s) of the 80  $\mu\text{m}$  grid sample processed by  $5.7 \times 10^4 \text{ W/cm}^2$ . These pictures record the changes inside the droplet. There are some bubbles observed, which slow down the freezing process.
